# Supplementary material for: Developmental Anomalies in Human Teeth: Odontoblastic Differentiation in Hamartomatous Calcifying Hyperplastic Dental Follicles Presenting with DSP, Nestin, and HES1
Source: MDPI journal article supplement (doi:10.3390/jdb12010007), 2024-01-30
Supplement: s1 [file s1]

Table S1. Clinical Summary

| Case  | Age | Sex | Location | Clinical diagnosis     |
|-------|-----|-----|----------|------------------------|
| HDF1  | 11  | F   | 38       | ameloblastoma          |
| HDF2  | 13  | F   | 13       | odontogenic fibroma    |
| HDF3  | 11  | F   | 21       | embedded tooth         |
| HDF4  | 37  | F   | 48       | odontogenic tumor      |
| HDF5  | 14  | F   | 37       | embedded tooth         |
| HDF6  | 15  | F   | 43,44,45 | odontogenic keratocyst |
| HDF7  | 14  | F   | 45       | odontogenic tumor      |
| HDF8  | 66  | F   | 38       | dentigerous cyst       |
| HDF9  | 17  | M   | 48       | dentigerous cyst       |
| HDF10 | 12  | F   | 47       | dentigerous cyst       |
| HDF11 | 27  | F   | 13,23    | dentigerous cyst       |
| HDF12 | 49  | F   | 48       | odontogenic tumor      |
| HDF13 | 15  | M   | 13       | dentigerous cyst       |
| HDF14 | 26  | M   | 28       | odontogenic tumor      |
| HDF15 | 50  | M   | 38       | dentigerous cyst       |
| HDF16 | 56  | M   | 18       | dentigerous cyst       |
| HDF17 | 15  | M   | 48       | odontogenic keratocyst |
| HDF18 | 20  | F   | 38       | odontogenic tumor      |
| HDF19 | 11  | F   | 13,23    | odontogenic tumor      |
| HDF20 | 12  | M   | 13       | dentigerous cyst       |
| HDF21 | 15  | F   | 36       | dentigerous cyst       |
| HDF22 | 16  | F   | 42       | odontogenic tumor      |
| HDF23 | 16  | F   | 42       | odontogenic tumor      |
| HDF24 | 16  | M   | 38       | dentigerous cyst       |
| HDF25 | 12  | F   | 47       | dentigerous cyst       |
| HDF26 | 15  | M   | 37       | dentigerous cyst       |
| HDF27 | 11  | M   | 13       | dentigerous cyst       |
| HDF28 | 6   | M   | 11       | odontogenic tumor      |
| HDF29 | 13  | F   | 21       | odontogenic tumor      |
| HDF30 | 48  | F   | 38       | dentigerous cyst       |
| HDF31 | 43  | M   | 38       | odontogenic keratocyst |
| HDF32 | 13  | M   | 16       | dentigerous cyst       |
| HDF33 | 15  | M   | 48       | dentigerous cyst       |
| HDF34 | 15  | M   | 38       | dentigerous cyst       |
| HDF35 | 23  | M   | 47       | dentigerous cyst       |
| HDF36 | 22  | F   | 48       | dentigerous cyst       |
| HDF37 | 16  | M   | 38       | mandibular cyst        |
| HDF38 | 50  | F   | 48       | dentigerous cyst       |
| HDF39 | 15  | M   | 38       | Impacted tooth         |
| HDF40 | 3   | F   | 51       | Impacted tooth         |

HDF: hyperplastic dental follicle; Location: described by the FDI World Dental Federation numbering system
