# Supplementary material for: Developmental Anomalies in Human Teeth: Odontoblastic Differentiation in Hamartomatous Calcifying Hyperplastic Dental Follicles Presenting with DSP, Nestin, and HES1
Source: MDPI journal article supplement (doi:10.3390/jdb12010007), 2024-01-30
Supplement: s1 [file s1]

Table S2. Histological findings of hyperplastic dental follicles (HDFs)

| Case  | Cyst formation |     | Odonto-<br>dysplasia | Stroma  |        |            | Epithelium           |                             |        |            | Hard tissue formation |                   |           |                              |
|-------|----------------|-----|----------------------|---------|--------|------------|----------------------|-----------------------------|--------|------------|-----------------------|-------------------|-----------|------------------------------|
|       | (type)         |     |                      | Fibrous | Myxoid | Giant cell | Epithelial<br>island | Epithelial<br>proliferation | (type) | Ghost cell | Enameloid             | Psammo-<br>matous | Dentinoid | Calcifying<br>whorled nodule |
| HDF1  | -              |     | -                    | +       | -      | -          | +                    | -                           |        | -          | -                     | -                 | -         | -                            |
| HDF2  | -              |     | -                    | +       | -      | -          | +                    | -                           |        | -          | -                     | -                 | -         | -                            |
| HDF3  | -              |     | -                    | -       | -      | -          | +                    | +                           | DGCT   | +          | +                     | -                 | +         | -                            |
| HDF4  | -              |     | -                    | -       | +      | -          | +                    | -                           |        | -          | -                     | -                 | +         | -                            |
| HDF5  | -              |     | -                    | +       | +      | -          | +                    | -                           |        | -          | -                     | -                 | +         | -                            |
| HDF6  | -              |     | +                    | +       | +      | -          | +                    | -                           |        | -          | -                     | +                 | +         | +                            |
| HDF7  | -              |     | -                    | +       | +      | -          | +                    | +                           | DGCT   | -          | -                     | -                 | +         | -                            |
| HDF8  | +              | DC  | -                    | +       | -      | -          | +                    | +                           | DGCT   | -          | -                     | -                 | +         | -                            |
| HDF9  | -              |     | -                    | +       | +      | -          | +                    | -                           |        | -          | -                     | +                 | +         | +                            |
| HDF10 | -              |     | -                    | +       | +      | -          | +                    | -                           |        | +          | -                     | -                 | +         | -                            |
| HDF11 | -              |     | -                    | +       | +      | -          | +                    | -                           |        | -          | -                     | -                 | +         | -                            |
| HDF12 | -              |     | -                    | +       | -      | -          | +                    | -                           |        | -          | -                     | +                 | +         | +                            |
| HDF13 | -              |     | +                    | +       | +      | -          | +                    | -                           |        | -          | -                     | +                 | +         | +                            |
| HDF14 | +              | DC  | -                    | +       | -      | -          | +                    | -                           |        | -          | -                     | +                 | +         | +                            |
| HDF15 | +              | DC  | -                    | +       | -      | -          | -                    | -                           |        | -          | -                     | +                 | +         | +                            |
| HDF16 | +              | DC  | -                    | +       | -      | -          | -                    | -                           |        | -          | -                     | +                 | +         | -                            |
| HDF17 | +              | OKC | -                    | -       | +      | -          | +                    | -                           |        | -          | -                     | -                 | -         | -                            |
| HDF18 | +              | OKC | -                    | -       | +      | -          | +                    | -                           |        | -          | -                     | -                 | -         | -                            |
| HDF19 | -              |     | -                    | +       | +      | -          | +                    | -                           |        | +          | -                     | +                 | -         | -                            |
| HDF20 | -              |     | -                    | +       | -      | -          | +                    | -                           |        | -          | -                     | -                 | -         | -                            |
| HDF21 | -              |     | -                    | +       | +      | -          | +                    | +                           |        | +          | +                     | -                 | +         | -                            |
| HDF22 | -              |     | -                    | +       | +      | -          | +                    | +                           |        | -          | -                     | +                 | -         | +                            |
| HDF23 | -              |     | -                    | +       | +      | -          | +                    | +                           |        | -          | -                     | +                 | -         | -                            |
| HDF24 | -              |     | -                    | +       | +      | -          | +                    | -                           |        | -          | -                     | +                 | -         | +                            |
| HDF25 | -              |     | -                    | +       | +      | +          | +                    | -                           |        | -          | -                     | -                 | -         | -                            |
| HDF26 | -              |     | -                    | +       | +      | -          | +                    | +                           | DGCT   | +          | +                     | +                 | +         | -                            |
| HDF27 | -              |     | -                    | -       | +      | -          | +                    | +                           |        | -          | -                     | +                 | -         | +                            |
| HDF28 | -              |     | -                    | -       | +      | -          | +                    | -                           |        | -          | -                     | -                 | -         | -                            |
| HDF29 | -              |     | -                    | +       | -      | -          | +                    | +                           | AOT    | -          | -                     | +                 | -         | -                            |
| HDF30 | +              | DC  | -                    | -       | -      | -          | +                    | +                           |        | -          | -                     | -                 | -         | -                            |
| HDF31 | +              | OKC | -                    | -       | +      | -          | +                    | +                           |        | -          | -                     | -                 | -         | -                            |
| HDF32 | -              |     | -                    | +       | +      | -          | +                    | -                           |        | -          | -                     | -                 | -         | -                            |
| HDF33 | -              |     | -                    | +       | +      | -          | +                    | +                           | DGCT   | +          | -                     | +                 | +         | -                            |
| HDF34 | -              |     | -                    | +       | +      | -          | +                    | -                           |        | -          | -                     | -                 | -         | -                            |
| HDF35 | -              |     | -                    | +       | +      | -          | +                    | -                           |        | -          | -                     | -                 | -         | -                            |
| HDF36 | -              |     | -                    | +       | +      | -          | +                    | -                           |        | -          | -                     | -                 | -         | -                            |
| HDF37 | +              | OKC | -                    | +       | +      | -          | +                    | -                           |        | -          | -                     | -                 | -         | -                            |
| HDF38 | +              | DC  | -                    | +       | -      | -          | +                    | +                           |        | -          | -                     | -                 | +         | -                            |
| HDF39 | -              |     | -                    | +       | +      | -          | +                    | +                           | DGCT   | +          | -                     | +                 | +         | -                            |
| HDF40 |                |     |                      |         | +      | -          | +                    | +                           |        | -          | -                     | -                 | -         | -                            |

DC: dentigerous cyst; OKC: odontogenic keratocyst; DGCT: dentinogenic ghost cell tumor-like; AOT: adenomatoid odontogenic tumor-like
