# Supplementary material for: Developmental Anomalies in Human Teeth: Odontoblastic Differentiation in Hamartomatous Calcifying Hyperplastic Dental Follicles Presenting with DSP, Nestin, and HES1
Source: MDPI journal article supplement (doi:10.3390/jdb12010007), 2024-01-30
Supplement: s1 [file s1]

Table S3. Immunohistochemical results of hyperplastic dental follicles (HDFs)

| Case  | CD56<br>(E/S/W) | nestin<br>(E/S/W) | HES1<br>(E/S/W) | CD117<br>(E/S/W) | DSP |
|-------|-----------------|-------------------|-----------------|------------------|-----|
| HDF1  |                 |                   |                 |                  |     |
| HDF2  |                 |                   |                 |                  |     |
| HDF3  |                 |                   |                 |                  |     |
| HDF4  |                 |                   |                 |                  |     |
| HDF5  |                 |                   |                 |                  |     |
| HDF6  | +/+/-           | -/+               | +/-             | -/-              | +   |
| HDF7  | -/+na           | -/+na             | +/-na           |                  | -   |
| HDF8  | +/+na           | -/+na             | -/-na           |                  | -   |
| HDF9  | +/+/-           | -/+               | +/-             | -/-              | -   |
| HDF10 | +/-na           | -/+na             | -/-na           |                  | -   |
| HDF11 |                 |                   |                 |                  |     |
| HDF12 | +/+/-           | -/-               |                 |                  | +   |
| HDF13 | +/+/-           | -/+               | +/-             | -/-              | +   |
| HDF14 | -/-na           | -/+na             | -/-na           |                  | -   |
| HDF15 | +/-/-           | -/+               | -/-             |                  | -   |
| HDF16 | na/-na          | na-/+na           |                 |                  |     |
| HDF17 | +/+na           | -/+na             |                 |                  |     |
| HDF18 | +/+na           | -/+na             |                 |                  |     |
| HDF19 | -/+na           | -/+na             | -/-na           |                  | -   |
| HDF20 | +/+na           | -/+na             | +/-na           |                  | -   |
| HDF21 | +/+na           | -/+na             | -/-na           |                  |     |
| HDF22 | +/+/-           | -/+               | +/-             | -/-              | +   |
| HDF23 | -/+na           | -/+na             | +/-na           |                  | -   |
| HDF24 | -/+na           | -/+               | -/-             |                  | -   |
| HDF25 | -/+na           | -/+na             | +/-na           |                  |     |
| HDF26 |                 |                   |                 |                  |     |
| HDF27 |                 |                   |                 |                  |     |
| HDF28 | na/+na          | na/+na            | na/-na          |                  |     |
| HDF29 |                 |                   |                 |                  |     |
| HDF30 |                 |                   |                 |                  |     |
| HDF31 |                 |                   |                 |                  |     |
| HDF32 |                 |                   |                 |                  |     |
| HDF33 |                 |                   |                 |                  |     |
| HDF34 |                 |                   |                 |                  |     |
| HDF35 |                 |                   |                 |                  |     |
| HDF36 |                 |                   |                 |                  |     |
| HDF37 |                 |                   |                 |                  |     |
| HDF38 |                 |                   |                 |                  |     |
| HDF39 | -/-na           | -/-na             | +/-na           |                  | +   |
| HDF40 |                 |                   |                 |                  |     |

E: epithelium; S: stroma; W: calcifying whorled nodule; na: not analyzed due to the absence of objects; Blank column: specimen not available for staining
